# Supplementary material for: Diversity and Toxigenicity of Fungi that Cause Pineapple Fruitlet Core Rot
Source: Toxins (Basel). 2020 May 21;12(5):339. doi: 10.3390/toxins12050339 (PMC7291148; doi:10.3390/toxins12050339)
Supplement: Supplementary file 1 [file toxins-12-00339-s001.pdf]

**Bastien Barral, Marc Chillet, Anna Doizy, Maeva Grassi, Laetitia Ragot,  
Mathieu Léchaudel, Noel Durand, Lindy Joy Rose, Altus Viljoen and  
Sabine Schorr-Galindo**

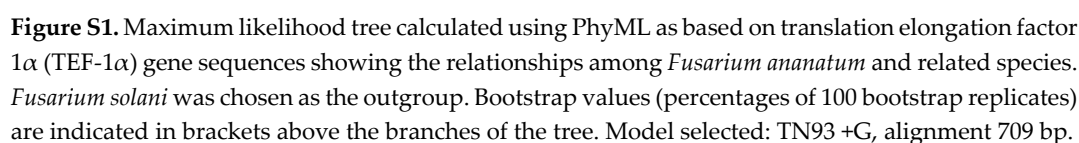

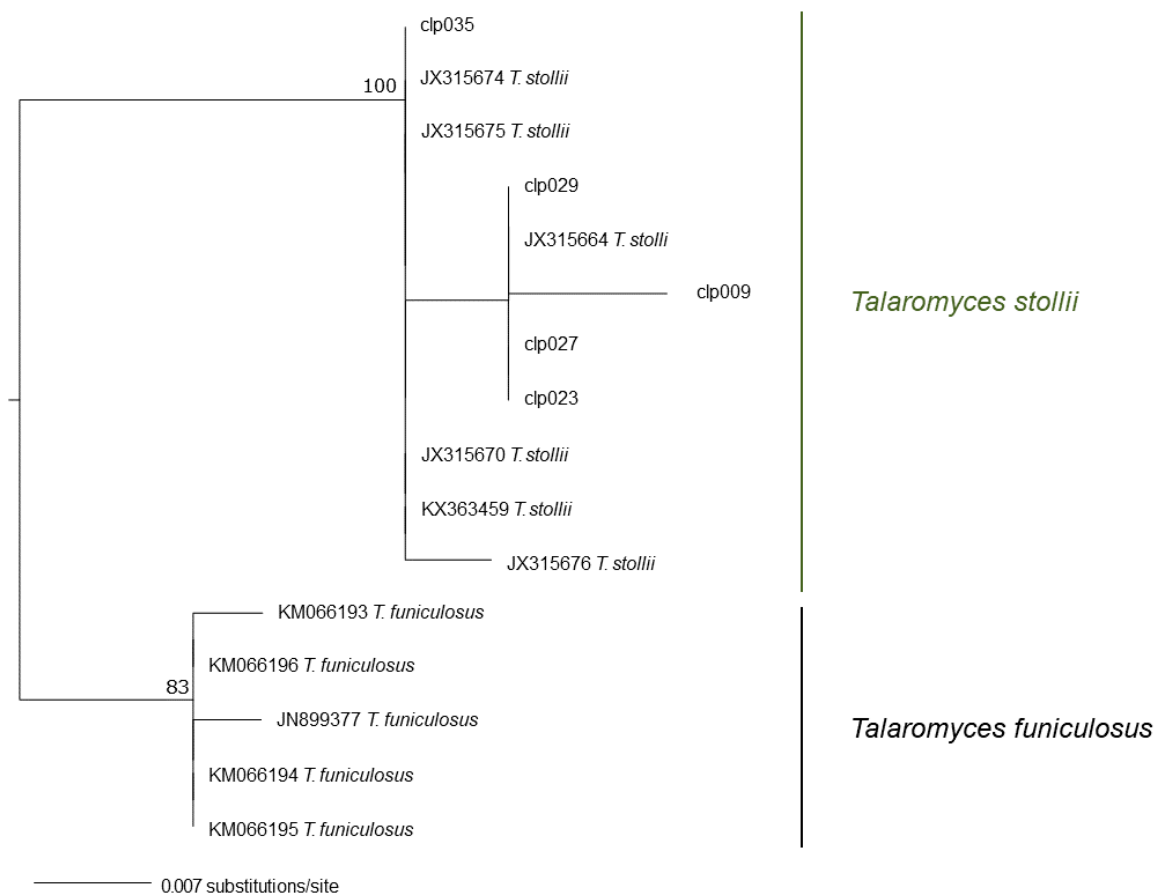

**Figure S2.** Maximum likelihood tree calculated using PhyML as based on internal transcribed spacer (ITS) sequences showing the relationships among *Talaromyces stollii* and related species. *Talaromyces dendriticus* was chosen as the outgroup. Bootstrap values (percentages of 100 bootstrap replicates) are indicated in brackets above the branches of the tree. Model selected: TN93, alignment 623 bp.
